# Supplementary material
Source: publisher site journal article supplement (https://www.dovepress.com/article/490620)
Supplement: Supplementary file 1 [file get_supplementary_file.php]

## Supplementary Material

## Methods – additional information

### ETHOS study (Rabe KF, *et al N Engl J Med* 2020;383:35–48)

**Study Overview:**

ETHOS (NCT02465567) was a 52-week, randomized, double-blind, parallel-group trial conducted in 26 countries. In a 52-week, phase 3, randomized trial to evaluate the efficacy and safety of triple therapy at two dose levels of inhaled glucocorticoid in patients with moderate-to very-severe COPD and at least one exacerbation in the past year, patients were assigned in a 1:1:1:1 ratio to receive twice-daily inhaled doses of triple therapy (inhaled glucocorticoid [320 μg or 160 μg of budesonide], a LAMA [18 μg of glycopyrrolate], and a LABA [9.6 μg of formoterol]) or one of two dual therapies (18 μg of glycopyrrolate plus 9.6 μg of formoterol or 320 μg of budesonide plus 9.6 μg of formoterol). The primary end point was the annual rate (the estimated mean number per patient per year) of moderate or severe COPD exacerbations, as analyzed in the modified intention-to-treat population with the use of on-treatment data only. Patients received twice-daily dosing with BGF 320, BGF 160, GFF 18/9.6 μg, or BFF 320/9.6 μg.

The study was conducted in 26 countries (721 site locations) between July 2015 and July 2019 (<https://www.clinicaltrials.gov/study/NCT02465567?cond=COPD&term=ETHOS&rank=1#participation-criteria>)

Follow Up: 14 Days After dosing discontinuation.

#### ETHOS Eligibility criteria (NCT02465567)

<https://www.clinicaltrials.gov/study/NCT02465567?cond=COPD&term=ETHOS&rank=1#participation-criteria> accessed 12 October, 2023

**Inclusion Criteria:**

- Non-child bearing potential (ie, physiologically incapable of becoming pregnant, including any female who is 2 years post-menopausal); or Child bearing potential, has a negative serum pregnancy test at Visit 1, and agrees to acceptable contraceptive methods used consistently and correctly for the duration of the study.
- Subjects with an established clinical history of COPD as defined by the American Thoracic Society (ATS)/European Respiratory Society (ERS),
- Current or former smokers with a history of at least 10 pack-years of cigarette smoking.
- Forced expiratory volume in 1 second (FEV1)/Forced vital capacity (FVC) ratio must be <0.70 and FEV1 must be <65% predicted normal value calculated using NHANES III reference equations (or reference norms applicable to other regions).
- Subjects with history of exacerbations.

**Exclusion Criteria:**

- Significant diseases or conditions other than COPD, which, in the opinion of the Investigator, may put the subject at risk because of participation in the study or may influence either the results of the study or the subject's ability to participate in the study.
- Women who are pregnant or lactating, or are planning to become pregnant during the course of the study, or women of childbearing potential who are not using an acceptable method of contraception.
- Subjects, who in the opinion of the Investigator, have a current diagnosis of asthma.
- Subjects who have been hospitalized due to poorly controlled COPD within 3 months prior to Visit 1 (Screening)
- Subjects who have poorly controlled COPD, defined as acute worsening of COPD that requires treatment with oral corticosteroids or antibiotics within 6 weeks prior to Visit 1 (Screening)
- Immune suppression or severe neurological disorders affecting control of the upper airway or other risk factors that in the opinion of the Investigator would put the subject at substantial risk of pneumonia.
- Subjects with a diagnosis of narrow angle glaucoma, who, in the opinion of the Investigator, have not been adequately treated.
- Subjects who have a history of hypersensitivity to β2-agonists, budesonide or any other corticosteroid components, glycopyrronium or other muscarinic anticholinergics, or any other component of the IMPs.

Please see full eligibility criteria in the protocol (Rabe KF, et al. N Engl J Med 2020;383:35–48; Supplementary Material).

### KRONOS study (Ferguson GT, *et al* *Lancet Respir Med* 2018;6:747–758)

**Study Overview:**

KRONOS (NCT02497001) was a 24-Week, randomized, double-blind, parallel-group trial conducted in four countries. It was a double-blind, parallel-group, multicentre phase 3 randomised controlled trial, patients from hospitals and care centres in Canada, China, Japan, and the USA were recruited. Eligible patients were 40–80 years of age, were current or former smokers (with a smoking history of ≥10 pack-years), had an established clinical history of COPD, and were symptomatic for COPD, despite receiving two or more inhaled maintenance therapies for at least 6 weeks before screening. We randomly assigned patients (2:2:1:1) using an interactive web response system to receive budesonide/glycopyrrolate/formoterol fumarate metered-dose inhaler 320/18/9·6 μg (BGF MDI), glycopyrrolate/formoterol fumarate metered-dose inhaler 18/9·6 μg (GFF MDI), budesonide/formoterol fumarate metered-dose inhaler 320/9·6 μg (BFF MDI), or open-label budesonide/formoterol fumarate dry-powder inhaler 400/12 μg (BUD/ FORM DPI). Primary endpoints for the Europe/Canada statistical analysis approach were FEV1 area under the curve from 0–4 h (AUC0–4) for BGF MDI versus BFF MDI and BGF MDI versus BUD/FORM DPI over 24 weeks; and change from baseline in morning pre-dose trough FEV1 for BGF MDI versus GFF MDI and non-inferiority of BFF MDI versus BUD/FORM DPI (margin of –50 mL from lower bound of 95% CI) over 24 weeks. Comparisons with BUD/FORM DPI were made for the Europe/Canada statistical analysis approach only.

The study was conducted in four countries (175 site locations) between August 2015 and January 2018 (https://www.clinicaltrials.gov/study/NCT02465567?cond=COPD&term=ETHOS&rank=1#participation-criteria )

Follow Up: 14 Days After dosing discontinuation.

KRONOS Eligibility Criteria (NCT02497001)https://www.clinicaltrials.gov/study/NCT02497001?cond=COPD&term=KRONOS&rank=1#participation-criteria accessed 12 October, 2023

**Inclusion Criteria**

- Given their signed written informed consent to participate.
- Non-child bearing potential (ie, physiologically incapable of becoming pregnant, including any female who is 2 years post-menopausal); or Child bearing potential, has a negative serum pregnancy test at Visit 1, and agrees to acceptable contraceptive methods used consistently and correctly for the duration of the study.
- Subjects with an established clinical history of COPD as defined by the American Thoracic Society (ATS)/European Respiratory Society (ERS), or other local applicable guidelines.
- Current or former smokers with a history of at least 10 pack-years of cigarette smoking.
- Forced expiratory volume in 1 second (FEV1)/Forced vital capacity (FVC) ratio must be <0.70 and FEV1 must be <80% predicted normal value calculated using NHANES III reference equations (or reference norms applicable to other regions).
- Required COPD maintenance therapy:
- All Subjects must have been on two or more inhaled maintenance therapies for the management of their COPD for at least 6 weeks prior to Screening. Scheduled SABA and/or scheduled SAMA are considered inhaled maintenance therapies

**Exclusion Criteria**

- Significant diseases or conditions other than COPD, which, in the opinion of the Investigator, may put the subject at risk because of participation in the study or may influence either the results of the study or the subject's ability to participate in the study.
- Women who are pregnant or lactating, or are planning to become pregnant during the course of the study, or women of childbearing potential who are not using an acceptable method of contraception.
- Subjects, who in the opinion of the Investigator, have a current diagnosis of asthma.
- Subjects who have been hospitalized due to poorly controlled COPD within 3 months prior to Visit 1 (Screening) or during the Screening Period
- Subjects who have poorly controlled COPD, defined as acute worsening of COPD that requires treatment with oral corticosteroids or antibiotics within 6 weeks prior to Visit 1 (Screening) or during the Screening Period
- Immune suppression or severe neurological disorders affecting control of the upper airway or other risk factors that in the opinion of the Investigator would put the subject at substantial risk of pneumonia.
- Subjects with a diagnosis of narrow angle glaucoma, who, in the opinion of the Investigator, have not been adequately treated.
- Subjects who have a history of hypersensitivity to β2-agonists, budesonide or any other corticosteroid components, glycopyrronium or other muscarinic anticholinergics, or any other component of the IMPs.

Please see full eligibility criteria in the protocol <https://filehosting.pharmacm.com/DownloadService.ashx?client=CTR_MED_7111&studyid=4148&filename=PT010006-02_FINAL_Redacted_17MAY2018.pdf>(accessed 6 October 2023)

## Current Study (Mäenpää et al Hyperkalemia is an underestimated risk factor in COPD)

### *Assessments*

To classify a patients as a hyperkalemia case we first extracted all serum potassium measurements which had been registered at the screening visit and at the scheduled visits during the study period in the clinical trial. There were five scheduled visits during the 52 weeks of treatment in ETHOS and three during the 24 weeks of treatment in KRONOS. To keep the timepoint of assessments as equal as possible over visits and over patients we used only the measurements taken pre-dose of the investigational product at each visit. To each patient we could then assign their maximum potassium value (Kmax) and the patient was defined as a hyperkalemia case if Kmax≥5.5 mmol/L

The GOLD stages, which we used to classify COPD severity, are defined as follows:

- GOLD stage 2, forced expiratory volume in 1 s [FEV1] predicted 50–80%,
- GOLD stage 3, FEV1 predicted 30–50%,
- GOLD stage 4, FEV1 predicted <30%.

Age was categorised into two groups: aged <65 and ≥65 years.

In both KRONOS and ETHOS, congestive HF classified as New York Heart Association (NYHA) Class III/IV was an exclusion criterion. Therefore the patients with a history of HF who were included in our study cohort had HF of NYHA Class I/II.

#### Renal function

There were only 25 patients with very severe renal impairment (eGFR<30 mL/min/1.73 m2) in our study cohort, too few for any separate analysis. These 25 patients were included in the group of moderate-to-severe renal impairment (eGFR <60 mL/min/1.73 m2).

#### Concomitant medications

Beside the drugs of main interest (RAASi and beta-blockers) we explored the use of drugs that may increase serum potassium levels, including verapamil, trimethoprim, pentamidine, potassium-containing agents, amino acids, digoxin, suxamethonium, non-steroidal anti-inflammatory drugs, heparins, and calcineurin inhibitors (table S2).

#### Serum bicarbonate

Serum bicarbonate levels were measured at the same visits as the potassium value for most patients.

#### Statistical analyses

Associations between hyperkalemia and risk factors were assessed as odds ratios (ORs) using logistic regression models. The risk factors considered were sex, age, renal function, COPD severity, DM, HF history, and concomitant use of RAASis and beta-blockers. Apart from concomitant drug use, all factors were assessed at baseline.

Unadjusted ORs of each risk factor were estimated from univariate logistic regression models, with hyperkalemia (maximum serum potassium, Kmax ≥5.5 mmol/L) as the response and the factor as the only covariate and a random effect on study (levels KRONOS and ETHOS) to account for possible correlation of data coming from the same trial.

Final ORs were based on a multivariate logistic regression model, including all risk factors of main interest except age. Age seemed to cause co-linearities with other factors, especially with the renal function factor (age is a main component in calculation of eGFR). Also, the unadjusted OR for age did not show any association with hyperkalemia.

The association between hyperkalemia and use of RAASi was further investigated in a subgroup analysis over the eGFR categories. To avoid too small number of cases within the eGFR categories, patients who used any of ACEi, ARB, or MRA were combined into one group. However, due to unexpected results in the pattern of association over eGFR categories, we did perform separate subgroup analyses for use of ACEis, ARBs, and also for use of beta-blockers. The group of patients on MRAs was too small to be analyzed in subgroups. The results were further explored by assessing the frequencies of patients who used and did not use the drug within each eGFR category.

Exploratory investigations of other concomitant drugs were conducted by assessing frequency of use.

Serum bicarbonate levels (<22 or ≥22 mmol/L) were explored as a potential risk factor for hyperkalemia by means of comparisons of descriptive statistics of the whole study cohort, and within subgroups defined by eGFR and COPD severity. Patients with missing serum bicarbonate records (98 patients) were excluded from the analysis.

### Results of exploratory analyses

#### Additional investigations of the observed association between hyperkalemia and use of RAASi within eGFR subgroups

To better understand the subgroup results, we explored frequencies of hyperkalemia cases in patients using ACEis, ARBs, MRAs, or beta-blockers versus those not using these medications over the three eGFR categories (table S6). The percentages of hyperkalemia cases were generally slightly higher among those who used these medications (except for ARB users) than those who did not; the percentages of hyperkalemia cases decreased as eGFR increased. The percentage of hyperkalemia cases was highest in patients with moderate-to-severe renal impairment (eGFR <60 mL/min/1.73 m2). However, the relative difference between patients who used these medications and those who did not was larger in the normal-to-high renal function category (eGFR ≥90 mL/min/1.73 m2) than in the other renal function categories.

#### Hyperkalemia incidence within serum bicarbonate subgroups

Overall, 65 (3.8%) of 1703 patients with low serum bicarbonate (<22 mmol/L) and 442 (7.1%) of 6185 patients with normal–high serum bicarbonate had hyperkalemia (table S7). In patients without CKD (eGFR ≥60 mL/min/1.73 m2), a difference in percentage of hyperkalemia cases was observed between those with low and those with normal-high serum bicarbonate; 2.5% versus 6.7%. In patients with CKD (eGFR <60 mL/min/1.73 m2), the percent cases in the two serum bicarbonate groups were similar (10.4% and 10.5%, respectively).

Evaluation of percent of hyperkalemia cases over the GOLD stages showed similar percent cases (3.6%-4.3%) among patients with hypobicarbonatemia, while an increasing trend, from 5.9% cases in GOLD 2 to 8.5% cases in GOLD 4, was observed among those with normal-high serum bicarbonate (figure 5, table S7).

# **Tables**

**Table S1:** Total number (%) of patients and number (%) of hyperkalemia cases by study and race. Patients were classified as hyperkalemia cases if their maximum registered serum potassium measurement (Kmax) taken at screening or at any scheduled visit was at least 5.5 mmol/L.

|  | **KRONOS, n=1463** | | **ETHOS, n=7771** | |
| --- | --- | --- | --- | --- |
| **Race group** | Total*  n (%) | Kmax ≥5.5  n (%) | Total*  n (%) | Kmax ≥5.5  n (%) |
| White | 950 (65) | 38 (4.0) | 7018 (90) | 475 (6.8) |
| Asian | 419 (29) | 12 (2.9) | 117 (1.5) | 8 (6.8) |
| Black or African American | 90 (6.2) | 5 (5.6) | 315 (4.1) | 8 (2.5) |
| American Indian or Alaska native | 1 (0.07) | 0 | 139 (1.8) | 5 (3.6) |
| Native Hawaiian or other Pacific Islander | 1 (0.07) | 0 | 2 (0.03) | 0 |
| Other | 2 (0.14) | 0 | 180 (2.3) | 7 (3.9) |

Kmax=maximum serum potassium.

*All participants in KRONOS and ETHOS whose informed consent allowed secondary use of their clinical trial data.

**TableS2:** Use of different concomitant drugs

|  | **KRONOS, n=950** | | **ETHOS, n=7018** | | **Combined, n=7968** | |
| --- | --- | --- | --- | --- | --- | --- |
|  | Patients, n | Proportion of patients | Patients, n | Proportion of patients | Patients, n | Proportion of patients |
| ACEis | 237 | 0.249 | 1983 | 0.283 | 2220 | 0.279 |
| ARBs | 91 | 0.096 | 1247 | 0.178 | 1338 | 0.168 |
| Amino acids | 1 | 0.001 | 31 | 0.004 | 32 | 0.004 |
| Antibiotics | 3 | 0.003 | 169 | 0.024 | 172 | 0.022 |
| COXII | 17 | 0.018 | 102 | 0.015 | 119 | 0.015 |
| ICS as concomitant medication | 102 | 0.107 | 642 | 0.091 | 744 | 0.093 |
| LMWH or UFH | 27 | 0.028 | 388 | 0.055 | 415 | 0.052 |
| MRAs | 9 | 0.009 | 172 | 0.025 | 173 | 0.022 |
| Beta-blockers | 45 | 0.047 | 819 | 0.117 | 1652 | 0.207 |
| Nonselective | 21 | 0.022 | 258 | 0.037 | 279 | 0.035 |
| Selective | 168 | 0.177 | 1239 | 0.177 | 1407 | 0.177 |
| NSAIDS | 258 | 0.272 | 1542 | 0.22 | 1800 | 0.226 |
| PSDs | 0 | 0 | 87 | 0.012 | 87 | 0.011 |
| Potassium | 67 | 0.071 | 390 | 0.056 | 457 | 0.057 |
| ACEs or ARBs or MRAs | 187 | 0.197 | 1465 | 0.209 | 3537 | 0.444 |
| ACEs and ARBs | 329 | 0.346 | 3213 | 0.458 | 79 | 0.01 |

**Abbreviations:** ACEi, angiotensin-converting-enzyme inhibitor; ARB, angiotensin receptor blocker; COXII, cytochrome c oxidase subunit 2; ICS, inhaled corticosteroid; LMWH, low molecular weight heparin; MRA, mineralocorticoid receptor antagonist; NSAID, nonsteroidal anti-inflammatory drug; PSD, potassium-sparing diuretics; UFH, unfractionated heparin.

**Table S3:** Number and percentage of patients with severe hyperkalemia (Kmax ≥6.0 mmol/L) over COPD severity groups and eGFR categories.

| **Subgroup**  n, % | **Severe Hyperkalemia**  **n, row %** | |
| --- | --- | --- |
| eGFR group,  mL/min/1.73 m2 |  |  |
| <60, n=896, 11% | 18, 2.0% |  |
| 60–89, n=4413, 55% | 23, 0.5% |  |
| ≥90, n=2651, 33% | 11, 0.4% |  |
| COPD severity |  |  |
| GOLD 2, n=2510, 32% | 12, 0.5% |  |
| GOLD 3, n=4630, 58% | 37, 0.8% |  |
| GOLD 4, n=824, 10% | 3, 0.4% |  |

**Table S4:** Adjusted OR estimates of association between hyperkalemia and risk factors. ORs were estimated from a multivariate logistic regression model, including all factors listed in the table and a random effect on trial (ETHOS or KRONOS).

| **Risk factor** | **OR* (95% CI)** |
| --- | --- |
| Sex, male vs female | 1.01 (0.84–1.22) |
| Diabetes mellitus, Yes vs No | 1.28 (1.02–1.59) |
| Heart failure, Yes vs No | 1.16 (0.71–1.80) |
| COPD severity |  |
| GOLD 3 vs GOLD 2 | 1.28 (1.04–1.58) |
| GOLD 4 vs GOLD 2 | 1.64 (1.19–2.22) |
| eGFR category, mL/min/1.73 m2 |  |
| 60–89 vs ≥90 | 1.43 (1.16–1.79) |
| <60 vs ≥90 | 2.29 (1.71–3.04) |
| Use of concomitant medication |  |
| ACEi, Yes vs No | 1.25 (1.02–1.53) |
| ARB, Yes vs No | 1.07 (0.83–1.36) |
| MRA, Yes vs No | 1.42 (0.85–2.27) |
| Use of beta-blockers, Yes vs No | 1.08 (0.87–1.35) |

**Abbreviations:** ACEi, angiotensin-converting-enzyme inhibitor; ARB, angiotensin II receptor blocker; COPD, chronic obstructive pulmonary disease; eGFR, estimated glomerular filtration rate; GOLD, Global Initiative for Chronic Obstructive Lung Disease; MRA, mineralocorticoid antagonist; OR, odds ratio.

**Table S5:** Unadjusted OR estimates of association between hyperkalemia and risk factors based on univariate logistic regression models. Each model includes a random effect on study, and the risk factor to be estimated as the single covariate.

| **Risk factor** | **OR (95%CI)** |
| --- | --- |
| Sex, male vs female | 1.07 (0.90–1.29) |
| Age, ≥65 vs <65 | 1.07 (0.89–1.28) |
| COPD severity |  |
| GOLD 3 vs GOLD 2 | 1.24 (1.01–1.54) |
| GOLD 4 vs GOLD 2 | 1.50 (1.10–2.03) |
| eGFR category, mL/min/1.73 m2 |  |
| 60–89 vs ≥90 | 1.45 (1.17–1.80) |
| <60 vs ≥90 | 2.41 (1.82–3.19) |
| Diabetes mellitus | 1.44 (1.16–1.78) |
| Heart failure | 1.56 (0.98–2.36) |
| Use of ACEis | 1.35 (1.11–1.35) |
| Use of ARBs | 1.11 (0.88–1.39) |
| Use of MRAs | 1.79 (1.08–2.81) |
| Use of beta-blockers | 1.31 (1.06–1.60) |

**Abbreviations:** ACEi, angiotensin-converting-enzyme inhibitor; ARB, angiotensin II receptor blocker; eGFR, estimated glomerular filtration rate; GOLD, Global Initiative for Chronic Obstructive Lung Disease; MRA, mineralocorticoid antagonist; OR, odds ratio.

**Table S6:** Exploratory subgroup analyses of RAASi use within each eGFR category. Association between hyperkalemia and concomitant medications, by eGFR categories; ORs with 95% CI. Estimated ORs are adjusted for diabetes and for use of other concomitant medications included in the table.

| **Subgroup** | **Estimated subgroup specific ORs (95% CI)** | | | |
| --- | --- | --- | --- | --- |
| eGFR group, mL/min/1.73 t5 (n, %) | ACEi, ARB or MRA | ACEi | ARBs | Beta-blockers |
| <60 (n=896, 11%) | 1.19 (0.76–1.88) | 1.42 (0.91–2.22) | 0.99 (0.60–1.62) | 1.03 (0.66–1.62) |
| 60–89 (n=4413, 55%) | 1.07 (0.84–1.36) | 1.13 (0.87–1.47) | 0.93 (0.67–1.29) | 1.02 (0.76–1.35) |
| ≥90 (n=2651, 33%) | 1.63 (1.13–2.34) | 1.49 (1.02–2.19) | 1.58 (0.97–2.57) | 1.42 (0.91–2.22) |

**Abbreviations:** ACEi, angiotensin-converting-enzyme inhibitor; ARB, angiotensin II receptor blocker; eGFR, estimated glomerular filtration rate; MRA, mineralocorticoid antagonist; OR, odds ratio; RAASi=renin-angiotensin-aldosterone system inhibitor.

**Table S7:** Percentage of hyperkalemia cases among users and non-users of RAASis, and by eGFR category. Unadjusted OR estimates are shown for reference. All cell-counts are >20 except if stated otherwise (MRA users).

|  | **eGFR category, mL/min/1.73 m2** | | | | | |
| --- | --- | --- | --- | --- | --- | --- |
|  | **eGFR <60**  n=896 | | **eGFR 60-89**  n=4413 | | **eGFR ≥90**  n=2651 | |
|  | % cases | OR | % cases | OR | % cases | OR |
| User ACEi | 12.6 | 1.39 | 7.4 | 1.18 | 6.4 | 1.58 |
| Non-user ACEi | 9.4 | 6.4 | 4.1 |
| User ARB | 10.2 | 0.95 | 6.3 | 0.93 | 6.8 | 1.57 |
| Non-user ARB | 10.6 | 6.7 | 4.4 |
| User MRA | 12.5 (n=4) | 1.23 | 11.4 (n=13) | 1.84 | 8.6 (n=3) | 1.92 |
| Non-user MRA | 10.4 | 6.5 | 4.7 |
| User beta-blocker | 11.2 | 1.11 | 7.2 | 1.12 | 6.8 | 1.59 |
| Non-user beta-blocker | 10.1 | 6.5 | 4.4 |

**Abbreviations:** ACEi, angiotensin-converting-enzyme inhibitor; ARB, angiotensin II receptor blocker; eGFR, estimated glomerular filtration rate; MRA, mineralocorticoid antagonist; OR, odds ratio; RAASi=renin-angiotensin-aldosterone system inhibitor.

**Table S8:** Number and percentage of patients (in total and hyperkalemia cases) in low, normal, and high bicarbonate categories, by COPD severity and by eGFR category.

|  | **Serum bicarbonate, mmol/L** | | | | | |
| --- | --- | --- | --- | --- | --- | --- |
| **Group** | **low (<22)** | | **normal (22–30)** | | **high (>30)** | |
| total  n (%†) | cases  n (%‡) | total  n (%†) | cases  n (%‡) | total n (%†) | cases  n (%‡) |
| All, n=7888* | 1703 (22) | 65 (3.8) | 6042 (77) | 425 (7.0) | 143 (1.8) | 17 (12) |
| COPD severity |  | | |  | | |
| GOLD 2, n=2486 | 687 (28) | 28 (4.1) | 1777 (71) | 104 (5.9) | 22 (0.9) | 2 (9.1) |
| GOLD 3, n=4583 | 899 (20) | 32 (3.6) | 3590 (78) | 262 (7.3) | 94 (2.1) | 14 (15) |
| GOLD 4, n=819 | 117 (14) | 5 (4.3) | 675 (82) | 59 (8.7) | 27 (3.3) | 1 (3.7) |
| eGFR, mL/min/1.73 m2 |  | | |  | | |
| ≥60, n=6998 | 1425 (20) | 36 (2.5) | 5440 (78) | 362 (6.7) | 133 (1.9) | 15 (11) |
| <60, n=890 | 278 (31) | 29 (10.4) | 602 (68) | 63 (10.5) | 10 (1.1) | 2 (20) |
|  |  |  |  |  |  |  |

**Abbreviations:** COPD, chronic obstructive pulmonary disease; eGFR=estimated glomerular filtration rate; GOLD, Global Initiative for Chronic Obstructive Lung Disease.

*All who had non-missing data for serum bicarbonate, GOLD stage and eGFR. †Row percentage. ‡Percentage cases in cross-group.

**Table S9**: Independent ethics committees and institutional review boards consulted for the ETHOS study

| **Name of ethics committee/institutional review board** | **Address** | |
| --- | --- | --- |
| **Argentina** | | |
| Comité de Ética en Investigación | INAER Arenales 3146 1° A (C1425BEN)  Ciudad Autónoma de Buenos Aires, Argentina | |
| CCIS and Local EC Comité de Etica de CER Investigaciones Clinicas (CECIC) Pdte | Perón N° 489 2°C (CP1878)  Quilmes Oeste, Buenos Aires, Argentina | |
| Comité de Ética | Ave Pulmo, Alvear 3345  Mar del Plata, Buenos Aires, Argentina | |
| Comité Independiente de Etica para  Ensayos en Farmacología Clínica | CIEFC Av Cabildo1536 piso 5° B CABA (C1426ABP) Buenos Aires, Argentina | |
| CCIS and Local EC: Comité de Bioética | Cimel Tucumán 1314  Lanús Este, Buenos Aires, Argentina | |
| Comité lndependiente de Ética de Investigación en Salud | Av. Colon 2057 Córdoba (X5003DCE)  Córdoba, Argentina | |
| Comité lndependiente de Ética Iniciativa y Reflexión Bioética | Rosario Rioja 2926, Rosario, Santa Fé (S20020JN) Argentina | |
| CCIS and Local EC: Comité de Ética en Investigación | lnstituto de Investigaciones Clínicas Av. Colón 3364 B7600FZN, Mar del Plata, Argentina | |
| CCIS and Local EC: CEI CIM-MDP | Av. Colón 3083. Piso 5. CP 7600 Mar del Plata, Buenos Aires, Argentina | |
| CCIS and Local EC: Comité de Ética y Docencia de Diagnóstico Maipú (CEDIMA) | Av. Pte. Perón 999, San Fernando Buenos Aires, Argentina | |
| CCIS and Local EC: Comité de Ética en Investigación | Instituto Ave Pulmo, Alvear 3345, Mar del Plata Buenos Aires, Argentina | |
| Comité lndependiente de Etica Medica del Noroeste Argentino | Las Piedras 496, 4° Piso, San Miguel de Tucumán  Tucumán, Argentina | |
| CCIS and Local EC: Comité de Ética del lnstituto Medico Platense (CEDIMP) | Boulevard 51 N°335  La Plata, Buenos Aires, Argentina | |
| CCIS and Local EC: CEI CEMER –  Comité de Ética en Investigación de CEMER | Esmeralda 1550 (B1602DQD), Florida, Vicente López  Buenos Aires, Argentina | |
| Comité de Ética lndependiente Consultorios Integrados | CEICI Italia 424, Rosario ZC 2000  Santa Fé, Argentina | |
| Comité de Ética en Investigación Clínica (CEIC) | Larrea 1381 3°"A'', Ciudad Autónoma de Buenos Aires  Buenos Aires, Argentina | |
| Comité de Ética en Investigación (CEI) del Centro de Investigaciones Metabólicas | Viamonte 2278, C1056ABJ  CABA, Argentina | |
| Comité de Ética en Farmacología Clínica de la Fundación (CIDEA) | CEFC Paraguay 2041 Piso 9°H (C1121ABE)  CABA, Argentina | |
| Comité de Etica para Investigación Clínica | Alvear 854– S2000,Rosario  Santa Fé, Argentina | |
| Comité de Ética Independiente | Patagónico, Urquiza 646, Santa Rosa (6300) La Pampa, Argentina | |
| FumeLit (Fundación Médica del Litoral) | Av Freyre 3048–3000  Santa Fé, Argentina | |
| Comité lndependiente de Etica en Investigación Biomédica de la Fundación Neurólogica Argentina | Uruguay 824, Piso 1, C1015ABR  Ciudad Autónoma de Buenos Aires, Argentina | |
| **Australia** | | |
| Belberry Ltd | 129 Glen Osmond Rd, Eastwood  SA 5063, Australia | |
| Western Sydney Local Health District HREC Research Office | Level 2, REN Building, Westmead Hospital, Hawkesbury & Darcy Roads,  Westmead, NSW 2145, Australia | |
| **Austria** | | |
| Ethikkornrnission für das Bundesland Salzburg | Sebastian-Stief-Gasse, 2 5020  Salzburg, Austria | |
| **Belgium** | | |
| Cliniques Universitaires UCL, Bruxelles | Comité d'Ethique Hospitalo, Facultaire Saint-Luc, UCL, OM 003, Belgium | |
| **Canada** | | |
| Nova Scotia Health Authority Research Ethics Board (NSHA REB) | 5790 University Avenue, Room 118, CCR Building, Halifax, Nova Scotia, B3H 1V7, 902-470-6511, Canada | |
| Concordia Hospital Ethics Committee | 1095 Concordia Avenue, Winnipeg, Manitoba, Canada  R2K3S8 204-661-7160 | |
| Health Research Ethics Board of Alberta Clinical Trials | Committee 1500, 10104–103 Avenue NW  Edmonton, Alberta, T5J 4A7, Canada  877-423-5727 | |
| IUCPQ Research Ethics Committee | Institut Universitaire de Cardiologie et de Pneumologie de Québec  Université Laval 2725  Chemin Sainte-Foy  Québec, G1V 405, Canada  418-656-8711 | |
| University of Saskatchewan Research Ethics Board (REB) or Committee 1607 | 110 Gymnasium Place, S7N OW9, Canada  306-966-2975 | |
| Hamilton Integrated Research Board | 293 Wellington Street North, Suite 102  Hamilton, Ontario, Canada  L8L 8E7 905-521-2100 X42013 | |
| **Chile** | | |
| Comité Ético Científico del Servicio de Salud Metropolitano | Sur OrienteAvenida Concha y Toro  3459 Puente Alto, Santiago, Chile | |
| Comité de Ética Científico Cientfifico del Servicio de Salud Metropolitano | SurAvenida Santa Rosa 3453 San Miguel, Santiago, Chile | |
| Comité de Ética Científico del Servicio de Salud Metropolitano | Oriente Avenida Salvador 364, Providencia, Santiago, Chile | |
| Comité Ético Científico del Servicio de Salud Viña del Mar | Quillota Calle Limache 1307 Viña del Mar, Valparaíso, Chile | |
| Comité Ético Científico Servicio de Salud Valparaiso–San Antonio |  | |
| Comité Ético Científico Servicio de Salud Concepción |  | |
| **China** | | |
| China-Japan Friendship Hospital Medicine/Medical Device Clinical Trial Ethics Committee | No. 2 East Sakura Road, Heping li, Chaoyang District, Beijing, China | |
| Medical Ethics Committee of Hebei General Hospital | Room 623, 6th Floor, Outpatient Building, Hebei General Hospital, No.348 Heping West Road, Shijiazhuang, Hebei Province, China | |
| The First Affiliated Hospital of Soochow University Ethics Committee | No. 188 Shizi Street, Suzhou  Jiangsu Province, China | |
| Ethics Committee of Beijing Chao-Yang Hospital Capital Medical University | Room 307, West Yard, Beijing  Chao-Yang Hospital, Beijing, China | |
| Ethics Committee of Beijing Friendship Hospital  Capital Medical University | No. 95 Yongan Road, Xicheng District, Beijing, China | |
| Ethics Committee on Drug Clinical Trials of The Second Hospital of Sun Qian Hebei Medical University | No. 215 Heping West Road, Shijiazhuan City, Hebei Province, China | |
| Ethics Committee of Beijing Anzhen Hospital | No. 2 Anzhen Road, Chaoyang District, Beijing, China | |
| Anhui Province Hospital Clinic  Research Ethic Committee | No. 17 Lujiang Road, Luyang District  Hefei City, Anhui Province, China | |
| Huadong Hospital Affiliated to Fudan University, Ethics  Committee | No.221 Yan’an West Road, Jing'an  District, Shanghai, China | |
| Ethics Committee of Qinghai Provincial People's Hospital | The second floor of the complex  building, No. 2 Gonghe Road  Chengdong Distric, Xi'ning City  Qinghai Province, China | |
| EC of Central Hospital of Minhang District | No. 170 Xinsong Road, Shanghai, China | |
| Ethics Committee for Institutional Review of Affiliated Hospital of Guangdong Medical College | 57 Renmin Avenue, Zhanjiang City  Guangdong Province, China | |
| Ethics Committee of The Affiliated Hospital of Xuzhou Medical College | 99 Huaihai West Road, Quanshan District, Xuzhou, Jiangsu Province, China | |
| Drug Clinical Trial Ethics Lei Luo Committee of Guizhou Provincial People's Hospital | No. 83 East Zhongshan Road, Guiyang, Guizhou Province, China | |
| EC of Sir Run Shawn Hospital School of Medicine  Zhejiang University | No. 3 East Qingchun Road, Hangzhou, Zhejiang Province, China | |
| Ethics Committee of the First Hospital of Lanzhou University | The Second Floor of the Bachelor Apartment, No 1 Donggang West Road, Chengguan District, Lanzhou City, Gansu Province, China | |
| Medical Ethics Committee of Affiliated Hospital of Guizhou Medical University | 10th Floor, North Campus of Guizhou Medical University, No. 9 Beijing Road  Guiyang Province, China | |
| Drug Clinical Trial Ethics Committee of Shenzhen People's Hospital | No. 1017 Dongmen North Road, Shenzhen City  Guangdong Province, China | |
| Ethics Committee of The Second People's Hospital of Shenzhen | No. 3002 Sungang West Road, Futian District, Shenzhen City, Guangdong Province, China | |
| Ethics Committee on Drug Clinical Trials of The First Affiliated Hospital of Baotou Medical College Inner Mongolia University of Science and Technology | No. 41 Linyin Road, Kundulun District, Baotou City  The Inner Mongolia Autonomous Region Province  China | |
| Biomedical Ethics Committee of Haikou People's Hospital | 43 Renmin Avenue, Haikou City, China | |
| Ethics Committee of Xiangya Hospital Central South University | No. 87 Xiangya Road, Kaifu District, Changsha  Hunan Province, China | |
| Ethics Committee of Guangzhou Red Cross Hospital | No. 396 Tongfuzhong Road, Haizlm District, Guangzhou City, Guangdong Province China | |
| Medical Ethics Committee of the Second Affiliated Hospital of Nanchang University | 10th Floor, Zonghe Building, No. 1 Minde Road, Nanchang, Jiangxi Province, China | |
| Ethics Committee of The Third Hospital of Hebei Medical University | Room 281, Research Building, The Third Hospital of  Hebei Medical University, 139 Ziqiang Road, Qiaoxi District, Shijiazhuang City Hebei Province, China | |
| Drug Clinical Trial Ethics Committee of Yanbian University Hospital | Room 310, Administrative Building, No. 1327 Juzi Street, Yanji City, Jinlin Province China | |
| Ethics Committee of the First Hospital of Changsha | No. 311 Yingpan Road, Kaifu District, Changsha, Hunan Province, China | |
| Ethics Committee of Nanjing First Hospital | 68 Changle Road, Qinhuai District  Nanjing City, Jiangsu Province, China | |
| EC of The Second Affiliated Hospital of Nanjing Medical  University | No. 121 Jiangjiayuan, Gulou District Nanjing City, Jiangsu Province, China | |
| EC of Hangzhou First People's Hospital | No. 261 Huansha Road  Shangcheng District, Hangzhou, Jiangsu Province, China | |
| Clinical Trial Ethics Sub-Committee, West China Hospital | Sichuan University  Room 412, Old No. 8 Teaching Building, West China Hospital, Sichuan University, No. 37 Guoxue Lane, Wuhou District, Chengdu, Sichuan Province, China | |
| Biomedical Research Ethics Committee of Peking University | First Hospital  No. 8 Xishiku Avenue, Xicheng District, Beijing, China | |
| Ethics Committee of the First Hospital of China Medical  University | Office of Ethics Committee  11th Floor, Building 1, No. 92 North Second Road, Heping Dstrict, Shenyang Liaoning Province, China | |
| Ethics Committee of the First Hospital of China Medical  University | 151 Li Bing Road, Zhangjiang Hi-Tech Park  Shanghai 201203, China | |
| EC of Jiangsu Province Hospital | No. 300 Guangzhou Road, Gulou District  Nanjing, Jiangsu Province, China | |
| EC of The First Affiliated Hospital | College of Medicine, Zhejiang University  No. 79 Qingchun Road, Uptown District, Hangzhou, Zhejiang Province, China | |
| EC of Jiangxi Pingxiang People's Hospital | No.8 Zhongda Road, Wugong  Mountain Development Area, Pingxiang City, Hunan Province, China | |
| Ethics Committee for The First Affiliated Hospital of Guangxi Medical University | No. 6 Shuangyong Road, Nanning City Guangxi Province, China | |
| Ethics Committee of the First People's Hospital of Changde | The Second Floor Corridor of No. 2 and No. 3 inpatient building No. 818 Renmin Road, Wuling District  Changde City, Hunan Province, China | |
| Clinical Drug-Device and New Medical Technologies Ethics Committee of The First Affiliated Hospital | Sun Yat-sen University, No. 58 Zhongshan 2nd Road, Yuexiu District, Guangzhou City, Guangdong Province, China | |
| Ethics Committee of Wuhan Forth Hospital | 473 Hanzheng Street, Qiekou District  Wuhan City, China | |
| Ethics Committee of Changsha Central Hospital | Room 205 of the Pharmaceutical Sciences Building, No. 161 Shaoshannan Road Yuhua District, Changsha City, Hunan Province, China | |
| Ethics Committee of Xiangtan Central Hospital Clinical Drug Trial | The Fifth Floor of the Outpatient Building, No. 120 Heping Road  Xiangtan City, Hunan Province, China | |
| EC of Shanghai East Hospital, Tongji University | No. 1800 Yuntai Road Pudong District, Shanghai, China | |
| Ethics Committee of The Affiliated Hospital of Inner Magnolia Medical University | No. 1 North Road, Huimin District  Hohhot, Inner Mongolia, China | |
| EC of Taizhou Hospital of Zhejiang Province | No. 150 Ximen Road, Linhai City  Zhejiang Province, China | |
| Ethics Committee of Inner Mongolia People's Hospital | No. 20 Zhaowuda Road, Hohhot,  Inner Mongolia, China | |
| Clinical Research and Applied Ethics Committee of The Third Affiliated Hospital of Guangzhou Medical University | No.63 Duobao Road, Liwan  District, Guangzhou City,  Guangdong Province, China | |
| **Czech Republic** | | |
| CEC Etická Komise Fakultni Nemocnice Královské Vinohrady | Šrobárova 1150/50 Praha 10, 100 34, Czech Republic | |
| LEC Lokální Etická Komise Nemocnice Mělník | Pražská 528, 276 01 Mělník  Czech Republic | |
| LEC Etická Komise Krajská Nemocnice Liberec, a.s. | Husova 10  460 63, Liberec 1, Czech Republic | |
| LEC Etická Komise Nemocnice Rudolfa a Stefanie Benešov, a.s., Nemocnice Stơedočeského Kraje | Máchova 400  256 30 Benešov, Czech Republic | |
| **France** | | |
| CPP Sud Est III Groupement Hospitalier Est Bâtiment Pinel | 59 Boulevard de Pinel  69 500 Bron, France | |
| **Germany** | | |
| Ethikkommission der Medizinischen Hochschule Hannover | Carl-Neuberg-Str. 1, 30625 Hannover, Germany | |
| Hungary | | |
| CEC Medical Research Council Ethics Committee for Clinical Pharmacology (MRC-ECCP)/Egészségügyi Tudományos Tanács Klinikai Farmakológiai Etikai Bizottsaga (ETT-KFEB) | | 1051 Budapest, Arany János u. 6–8, Hungary |
| **Italy** | | |
| CEC Comitato Etico Milano Area B Fondazione IRCCS Ca' Granda Ospedale Maggiore Policlinico | | Via Francesco Sforza, 28 20122 Milano, Italy |
| LEC Comitato Etico | | Milano Area 2 Via F. Sforza n. 28 20122 Milano, Italy |
| LEC Comitato Etico Regione Toscana Area Vasta Nord Ovest | | Via Roma 67, 56126 Pisa, Italy |
| LEC Comitato Etico | | Viale del Policlinico 155 00161 Roma, Italy |
| LEC Comitato Etico Milano Area 1 | | Via G.B. Grassi, 74 20157 Milano, Italy |
| LEC Comitato Etico Milano Area B Fondazione IRCCS Ca' Granda Ospedale Maggiore Policlinico | | Via Francesco Sforza, 28 20122 Milano, Italy |
| LEC Comitato Etico Seconda Università degli Studi di Napoli Ospedale dei Colli | | Via Leonardo Bianchi snc, 80131 Napoli, Italy |
| LEC Comitato Etico Area 1 | | AOU Ospedali Riuniti Foggia, Viale Luigi Pinto, 1  71122 Foggia, Italy |
| LEC Comitato Etico lnteraziendale della Provincia di Messina AOU Policlinico "G. Martino" | | Via Consolare Valeria n. 1 98125, Messina, Italy |
| LEC Comitato Etico dell'Università "Sapienza" | | Viale del Policlinico, 155 00161, Roma, Italy |
| LEC Comitato Etico dell'Università Campus Bio Medico di Roma | | Via Álvaro del Portillo, 200  00128 Roma, Italy |
| LEC Comitato Etico Palermo 1 | | Via del Vespro 129,  90127 Palermo, Italy |
| LEC Comitato Etico di Area Vasta Emilia Centro | | Via Albertoni, 15  40138 Bologna, Italy |
| LEC Comitato Etico della Liguria Largo | | Rosanna Benzi 10  16132 Genova, Italy |
| LEC Comitato Etico Campania Sud | | Via Marconi, 66  80049 – Torre del Greco (NA), Italy |
| LEC Comitato Etico Area Vasta Emilia Nord Policlinico di Modena | | Via Largo del Pozzo 7 41124, Modena, Italy |
| LEC Comiatto Etico Milano Area 3 | | Piazza Ospedale Maggiore, 3 20162 Milano, Italy |
| LEC Comitato Etico Istituti Clinici Scientifici Maugeri SPA - IRCCS | | Via Salvatore Maugeri, 4 7100 Pavia, Italy |
| LEC Comitato Etico Area Vasta Emilia Nord Segreteria Locale di Parma Azienda Ospedaliero-Universitaria di Parma | | Via Gramsci 14 43126 Parma, Italy |
| LEC Comitato Etico Indipendente Policlinico Tor Vergata | | Viale Oxford, 81 – 00133 Roma, Italy |
| LEC Comitato Etico Unico Regionale – C.E.U.R.c/o IRCCS Centro di Riferimento Oncologico C.R.O | | Via Franco Gallini, 2 – 33081 Aviano (PN), Italy |
| LEC Comitato Etico Seconda Università degli Studi di NapoliOspedale dei Colli | | Via Leonardo Bianchi snc, 80131 Napoli, Italy |
| **Japan** | | |
| 1-19-35 | | Hagiwara, Oita,  870-0921, Japan |
| Nagata Hospital | | 523-1, Shimomiyanagamachi  Yanagawa-shi, Fukuoka, 832-0059, Japan |
| Sakaide City Hospital | | 3-1-2, Kotobukicho, Sakaide-shi  Kagawa, 762-8550, Japan |
| Kinki University Hospital | | 377-2, Onohigashi, Osakasayama-shi  Osaka, 589-8511, Japan |
| Tosei General Hospital | | 161, Nishioikawa-cho, Seto-shi  Aichi, 489-8642, Japan |
| Showa University Hospital | | 1-5-8, Hatanodai, Shinagawa-ku  Tokyo, 142-8666, Japan |
| **Mexico** | | |
| Mexico Centre For Clinical Research | | 709, Col. Del Valle, Del. Benito Juárez, Ciudad de México, C.P. 03100, Mexico |
| Comité de ética en Investigación del Instituto Jalisciense de Investigación Clínica | | Calle Penitenciaria 20. Colonia Centro, Mexico |
| Unidad de Investigación Clínica en Medicina, S.C. | | Avenida de la Clinica no. 2520, Int.  520. Colonia Sertoma, C.P. 64718. Monterrey, Nuevo León, Mexico |
| CEI Hospital La Misión S.A. de C.V. | | Avenida del Hospital 112, I° y 2° piso, Col. Sertoma, C.P. 64718  Monterrey, Nuevo León, Mexico |
| **Netherlands** | | |
| METC Stichting BEBO | | Stationsstraat 9  9401 KV Assen, The Netherlands |
| **New Zealand** | | |
| Health and Disability Ethics Committee | | Ministry of Health, Freyberg Building 20 Aitken Building, PO BOX 5013 Wellington 6001, New Zealand |
| **Peru** | | |
| Comité Institucional de Etica en Investigación de la  Asociación Benéfica Prisma | | Calle Carlos Gonzáles 251 San Miguel  15088 Lima, Perú |
| Comité de Ética en lnvestigación del Hospital Nacional  Guillermo Almenara Irigoyen – ESSALUD | | Av. Miguel Grau 800 La Victoria 15033, Perú |
| Comité Institucional de Ética en la Investigación del Hospital Nacional | | Cayetano Heredia, Av. Honorio Delgado 430, Urb Ingenierfa, San Martin de Porres, Lima, Perú |
| Comite Institucional de Bioética de Via Libre | | Paraguay 478, Cercado de Lima 15001, Perú |
| **Poland** | | |
| Komisja Bioetycma przy Śląskiej Izbie Lekarskiej | | ul. Grażyńskiego 49a 40-126 Katowice, Poland |
| **Russia** | | |
| Independent Interdisciplinary Committee on Ethics Evaluation of Clinical Trials | | 20, Build. 1, Delegatskaya Str.,  127473, Moscow, Russia |
| LEC at Federal State Institution "Federal Scientific Clinical Center of Specialized Kinds of Medical Care and Medical Technology of the Federal Medical and Biological Agency" | | 28 Orekhovy Bulv., 115682, Moscow, Russia |
| EC at Federal State Governmental Establishment  Burdenko Main Military Clinical Hospital of Russian Federation Defense Ministry | | 3 Hospitalnaya Square, 105229, Moscow, Russia |
| LIEC at SBHI of Leningrad Region Gatchina Clinical Interdistrict Hospital | | 15a, bid. I, Roshchinskaya Str., Gatchina, Leningrad Region, 188300, Russia |
| LEC at Non-governmental Private Healthcare Institution Scientific Clinical Center of Joint Stock Company Russian Railways | | 20 Chasovaya Str., 125315, Moscow, Russia |
| LEC at Municipal Autonomous Institution City Clinical Hospital | | #14 15B, 22 Partsyezda Str.  620039, Ekaterinburg, Russia |
| LEC at the State Budgetary Healthcare Institution of Moscow | | "City Clinical Hospital #51 of Healthcare Department of Moscow"  7/33 Alyabyeva Str.  121309, Moscow, Russia |
| FGBU "Policlinika #5" | | 14 Plushchiha Str.  119121, Moscow, Russia |
| PharmNadzor LLC3 | | Torzhkovskaya Str., Office 230, Saint-Petersburg  197342, Russia |
| LEC at SBHI of Lerringrad Region Occupational Pathology Center | | 27, Lit. 0, Mechnikov Av., Saint­Petersburg, 195271, Russia |
| EC at SBEI HPE "First Saint­Petersburg State Medical University named after LP. Pavlov" of Ministry of Health of the Russian Federation | | 10 Rentgena Str., Saint­Petersburg, 197101, Russia |
| LEC at Pirogov Russian National Research Medical University | | 1 Ostrovityanova Str., 117997, Moscow, Russia |
| LEC at FSBI «Policlinic No1» of Department for Presidential Affairs of the Russian Federation | | 26/28, Sivtsev Vrazhek Pereulok, Moscow, 119002, Russia |
| LEC at SFEI of HPT "I.M. Sechenov First Moscow State Medical University" of the Ministry of Health of the Russian Federation | | 8, Bld.2, Trubetskaya Str., Moscow, 119991, Russia |
| LEC First City Clinical Hospital named after E.E. Volosevich | | 1 Suvorova Str., 163001, Arkhangelsk, Russia |
| **Serbia** | | |
| Ethics Committee of Serbia | | Vojvode Stepe 458, 11000 Belgrade, Serbia |
| LEC Institute for Pulmonary Disease Sremska Kamenica | | Put Dr Goldmana 4, 21204 Sremska Kamenica, Serbia |
| LEC Clinical Center of Serbia | | Pasterova 2, 11000 Belgrade, Serbia |
| LEC General Hospital Valjevo | | Sindjeliceva 62, 14000 Valjevo, Serbia |
| LEC CHC Zvezdra | | Dimitrija Tucovica 131, 11000 Belgrade, Serbia |
| LEC Municipal Institute for Lung Diseases and Tuberculosis | | Presevska 36, 11000 Belgrade, Serbia |
| Kliničko Bolnički Centar "Bežanijska Kosa" | | Bežanijska Kosa bb, 11080 Beograd, Serbia |
| Institut za Plućne Bolesti Vojvodine/Institute for Pulmonary Diseases of Vojvodina | | Put dr Goldmana 4  21204 Sremska Kamenica, Serbia |
| Klinički Centar Niš | | Clinical Center Nis  Bulevar dr Zorana Djijdjica 48, 18000 Nis, Serbia |
| Klinički Centar Kragujevac (Clinical Center Kragujevac) | | Zmaj Jovina 30,  34000 Kragujevac, Serbia |
| **South Africa** | | |
| Pharma-Ethics | | 123 Amcor Road, Lyttleton Manor, Centurion, South Africa |
| University of Stellenbosch HREC | | 5th Floor Teaching Block, Faculty of Medicine and Health Sciences, Francie van Zijl Drive, Parow, South Africa |
| University of Cape Town HREC | | Old Main Building, Groote Schuur Hospital  Floor E52, Room 23, Observatory, Cape Town, South Africa |
| **Spain** | | |
| CEIC-Parc de Salut MAR IMIM - Institut de Recerca Hospital del Mar | | Pare de Recerca Biomèdica de Barcelona  Cl Doctor Aiguader, 88 08003 Barcelona, Spain |
| **Sweden** | | |
| Etickprövningsmyndigheten | | Box 2110, 75002 Uppsala, Sweden |
| **Taiwan** | | |
| CEC Chang Gung Medical Foundation Institutional Review Board | | No. 5 Fusing St., Gueishan Township, Taoyuan City, Taiwan |
| LEC Research Ethics Review Committee, Far Eastern Memorial Hospital | | No 21 Nan-Ya S.R, Pan-Chiao, New-Taipei City, Taiwan |
| LEC Institutional Review Board, Kaohsiung Medical University Chung-Ho Memorial Hospital | | No. 100 Zuyu 1st Road, Kaohsiung City, Taiwan |
| LEC Institutional Review Board, E-Da Hospital | | No.6 Yida Road, Jiao-su Village, Yan-Chao District, Kaohsiung City, Taiwan |
| LEC Taichung Veterans General Hospital Institutional Review Board | | No. 1650 Taiwan Blvd Sec. 4, Taichung City, Taiwan |
| LEC Chang Gung Medical Foundation Institutional Review Board | | 199 Tung Hwa North Road, Taipei City, Taiwan, 10507 |
| LEC Research Ethics Committee, China Medical University & Hospital | | No. 2 Yude Road, North Dist., Taichung City, Taiwan |
| LEC Research Ethics Committee, National Taiwan University Hospital | | No 7, Chung Shan South Road, 100, Taipei, Taiwan |
| **United Kingdom** | | |
| East Midlands – Leicester South Research Ethics Committee | | Royal Standard Place, Nottingham, NG1 6FS, United Kingdom |
| United States of America | | |
| Advarra d/b/a Schulman Associates Institutional Review Board, Inc. | | 4445 Lake Forrest Drive Suite 300, Cincinnati, OH 45242, USA |
| Johns Hopkins Medicine Office of Human Subject Institutional Review Board | | 1620 McElderry Street Reed Hall, Suite B-130, Baltimore, MD 21205-1911, USA |

Reproduced with permission from Dove Medical Press. de Nigris E, Treharne C, Brighton N, Holmgren U, Walker A, Haughney J. Cost-Effectiveness of Triple Therapy with Budesonide/Glycopyrronium/Formoterol Fumarate Dihydrate versus Dual Therapies in Moderate-to-Very Severe Chronic Obstructive Pulmonary Disease: United Kingdom Analysis Using the ETHOS Study. *Int J Chron Obstruct Pulmon Dis*. 2022;17:2987-3000.

Abbreviations: CEC, central ethics committee; EC, ethics committee; LEC local ethics committee.

**Table S10**: Independent ethics committees and institutional review boards consulted for the KRONOS study

| Independent ethics committees/institutional review boards (IRB) |
| --- |
| Schulman, 4445 Lake Forest Drive, Suite 300, Cincinnati, OH 45242, USA |
| Showa University Hospital IRB, 158 Hatanodia, Shinagawa-KU, Tokyo, Japan |
| Nihonbashi EGAWA Clinic IRB, 2F Kotobuki Bld 1-1-3 Yaesu, Chuo-ku, Tokyo, Japan |
| Aso Iizuka Hospital IRB, 3-83, Yoshio-machi Iizuka-shi, Fukouka, Japan |
| Medical Corporation IHL, Shinagawa East One Medical Clinic IRB, 2-16-1 Shinagawa East One Tower 3F, Konan, Minato-ku, Tokyo, Japan |
| Review Board of Human Rights and Ethics for Clinical Studies IRB, 13-2 Ichiban-cho, Chiyoda‑ku, Tokyo, Japan |
| Social Medical Corporation Keiaikai Nakagami Hospital IRB, 6-2-25 Chibana, Okinawa-Shi, Okinawa, Japan |
| Harasanshin General Hospital IRB, 1-8 Taihakumachi Hakata-ku, Fukouoka-shi, Japan |
| Medical Corporate Corporation Mitsuyakai, Maebashi Hirosegawa Clinic IRB, 2-10-9 Chiyoda‑machi, Maebashi-shi, Gunma, Japan |
| Toyama University Hospital IRB, 2630 Sugiya Toyama-shi, Japan |
| Local Independent Administrative Agencies Naha City Hospital IRB, 2-31-1 Furujima, Naha-shi, Okinawa, Japan |
| Yaesu Sakura-dori Clinic IRB, Yaesu Center Bldg. 3F, 1-6-6 Yaesu Chuo-ku, Tokyo, Japan |
| Medical Corporation Association Shintokai, Yokohama Minoru Clinic IRB, 1-13-8 Bessho Minami-ku, Yokohama-shi, Kanagawa, Japan |
| Medical Corporation Seiwakai Nagata Hospital IRB, 523-1 Shimomiyanaga-machi, Yanagawa-shi, Fukuoka, Japan |
| Aida Hospital IRB, 216 Motomachi, Yabuki-machi, Nishishirakawa-gun, Fukushima, Japan |
| Okitama Public General Hospital IRB, 2000 Nishiotsuka, Kawanishi-machi, Higashiokitama-gun, Yamagata, Japan |
| Sakaide City Hospital IRB, 3-1-2 Kotobuki-cho, Sakaide-shi, Japan |
| IRB of International Health and Welfare Group of Kyushu District. 3-6-45 Momochihama, Sawara‑ku, Fukuoka-shi, Japan |
| Saiseikai Toyama Hospital IRB, 33-1 Kusunoki, Toyama-shi, Toyama, Japan |
| Fukuoka University Hospital IRB, 7-45-1 Nanakuma, Jonan-ku, Fukuoka-shi, Japan |
| Kyorin University Hospital IRB, 6-20-2 Shinkawa Mitaka-shi, Tokyo, Japan |
| Tosei General Hospital IRB, 160 Nishioiwake-cho, Seto-shi, Aichi, Japan |
| IRB of Kinki University Hospital, 377-2 Onohigashi, Osakasayama-shi, Osaka, Japan |
| Itabashi Hospital Nihon University School of Medicine IRB, 30-1 Oyaguchi Kamicho, Itabashi-ku, Tokyo, Japan |
| Matasusaka City Hospital IRB, 1550 Tonomachi, Matsusaka-shi, Mie, Japan |
| Hamamatsu Clinical Research Network IRB, 2-12-12, Sumiyoshi Naka-ku Hamamatsu-shi Shizuoka, Japan |
| National Hospital Organization Disaster Medical Center IRB, 3256 Midoricho, Tachikawa-shi, Tokyo, Japan |
| Iwata City Hospital IRB 512-3, Okubo Iwata-shi, Shizuoka, Japan |
| National Hospital Organization Kinki-Chuo Chest Medical Center IRB, 1180 Nagasonecho, Kita-ku, Sakai-shi, Osaka, Japan |
| Tohoku University Hospital IRB, 1-1 Seiryomachi, Aoba-ku, Sendai-shi, Miyagi, Japan |
| IRB of Juntendo University Hospital, 3-1-3 Hongo, Bunkyo-ku, Tokyo, Japan |
| Medical Corporate Corporation Mitsuyakai, Maebashi Hirosegawa Clinic IRB, 2-10-9 Chiyoda-machi, Maebashi-shi, Gunam, Japan |
| Shizuoka City Shizuoka Hospital IRB, 10-93 Ote-machi, Aoi-ku, Shizouka-shi Shizuoka Japan |
| Kokkakomuinkyosaikumiairengokai Kure Kyosai Hospital IRB, 2-3-28, Nishichuo, Kure-shi, Hiroshima, Japan |
| Chugoku Rosai Hospital IRB, 1-5-1 Hirotagaya, Kure-shi, Hiroshima, Japan |
| National Hospital Organization Okinawa National Hospital IRB, 3-20-14, Ganeko, Ginowan-shi, Okinawa, Japan |
| Japanese Red Cross Kyoto Daini Hospital IRB, 355-5 Haruobicho, Kamanzadori‑Marutamchi‑agaru, Kamigyo-ku, Kyoto, Japan |
| IRB of Ogaki Municipal Hospital, 4-86 Minaminokawa-cho, Ogaki-shi, Gifu, Japan |
| Rakuwakai Otowa Hospital IRB, 2 Otowachinji-cho, Yamashina-ku, Kyoto-shi Kyoto, Japan |
| NTT East Tohoku Hospital IRB, 2-29-1, Yamatomachi, Wakabayashi-ku, Sendai-shi, Miyagi, Japan |
| Medical Coproration Fujinokikai, Hoshikuma, Dermatology Allergy Clinic IRB, 2-1-1 Noke Sawara-ku Fukuoka-shi, Fukuoka, Japan |
| National Hospital Organization Tenryu Hospital IRB, 4201-2 Oro, Hamakita-ku Hamamatsu, Shizuoka, Japan |
| Kanazawa Medical University Hospital IRB, 1-1 Daigaku, Kahoku-gun uchinadamachi, Ishikawa, Japan |
| Kasaoka City Hospital IRB, 5628-1 Kasaoka, Kasaoka-shi, Okayama, Japan |
| Shimane Prefectural Central Hospital, IRB, 4-1-1 Himehara Izumo-shi, Shimane, Japan |
| Saiseikai Suita Hospital IRB, 1-2 Kawazonocho, Suita-shi, Osaka, Japan |
| St. Luke’s International Hospital IRB, 9-1 Akashi-cho, Chuo-ku, Tokyo, Japan |
| Toho University Ohashi Medical Center, 2-17-6 Ohashi, Meguro-ku, Tokyo, Japan |
| Sekino Hospital IRB, 3-28-3 Ikebukuro, Toshima-ku, Tokyo, Japan |
| Nagoya University Hospital IRB, 65 Tsurumaicho, Show-ku, Nagoysa-shi, Aichi, Japan |
| Medical Corporation TOUKEIKAI Kitamachi Clinic IRB, 1-1-3 Kichijoji Kitamachi, Musashino‑shi, Tokyo, Japan |
| Toyama Medical Association IRB, 336 Ninagawa, Toyama-shi, Toyama, Japan |
| Takeda Hospital Group IRB, 28-1 Ishidamoriminami-cho, Fushimi-ku, Kyoto-shi, Kyoto, Japan |
| Center Hospital of the National Center for Global Health and Medicine IRB, 1-21-1 Toyama, Shinjuku-ku, Tokyo, Japan |
| National Hospital Organization Tokyo National Hospital IRB, 3-1-1 Takeoka, Kiyose-shi, Tokyo, Japan |
| Osaka Police Hospital IRB, 10-31 Kitayama-cho, Tennouji-ku, Osaka-shi, Osaka, Japan |
| Kansai Medical University Hospital IRB, 2-3-1 Shinamchi, Kirakata-shi, Osaka, Japan |
| Shimane University Hospital IRB, 89-1 Enya-cho Izumo-shi, Shimane, Japan |
| Yokohama City University Hospital IRB, 3-9 Fukuura, Kanazawa-ku, Yokohama-shi, Japan |
| Nagoya Ekisaikai Hospital IRB, 4-66 Shonen-cho, Nakagawa-ku, Nagoya-shi, Aichi, Japan |
| Fujita General Hospital IRB, 14 Sanbongi, Tsukanome, Kunimi-machi, Date-gun, Fukushima, Japan |
| Yasuda Clinic IRB, 53 Kuzeoyabucho, Minami-ku, Kyoto-shi, Kyoto, Japan |
| Daido Hospital IRB, 9 Hakusui-cho, Minami-ku, Nagoya-city, Aichi, Japan |
| Makita Hospital IRB, 2-6-25, Shinkotoniljo, Kita-ku, Sapporo-City, Hokkaido, Japan |
| Kishiwada City Hospital IRB, 1001 Gakuhara-cho, Kishiwada-shi, Osaka, Japan |
| Takahashi Internal Medicine and Respiratory Clinic IRB, 14 Nishi 3-jo Minami 4 chome, Obihiro‑shi, Hokkaido, Japan |
| Nakatani Hospital IRB 2501 Hosoe, Shikama-ku, Himeji-shi, Hyogo, Japan |
| Medical Corporation, Ouryokukai Association Nihonbashi Sakura Clinic IRB, Inamura Bldg. 5F, 1‑9-2 Nihonbashi-Kayabacho, Chuo-Ku, Tokyo, Japan |
| Sendai Open Hospital IRB, 5-22-1 Tsurugaya, Miyagino-ku, Sendai, Miyagi, Japan |
| Nagaoka Red Cross Hospital IRB, 2-297-1, Sensyu, Nagaoka-shi, Niigata, Japan |
| Takamatsu Municipal Hospital IRB, 2-36-1 Miyawakicho, Takamatsu-shi, Kagawa, Japan |
| National Hospital Organization Ehime Medical Center IRB, 366 Yokogawara, Toon-shi, Ehime, Japan |
| National Hospital Organization Fukuoka Higashi Medical Center IRB, 1-1-1 Chidori, Koga-shi, Fukuoka, Japan |
| Ethics Committee of the Chinese PLA General Hospital, No. 28 Fuxing Road, Haidian District, Beijing, China |
| China-Japan Friendship Hospital Ethics Committee, No. 2 East Yinghua Road, Chaoyang District, Beijing 100029, China |
| Medical Ethics Committee of Guangdong General Hospital, No. 106 Zhongshan Second Road, Guangzhou, Guangdong Province, China |
| Ethics Committee of Hainan General Hospital, 3F, Information Building, Hainan General Hospital, No. 19 Xiuhua Road, Xiuying District, Haikou, Hainan, China |
| Inner Mongolia People’s Hospital Clinical Trial Ethics Committee, No. 20 Zhaowuda Road, Hohhot, Inner Mongolia, 010017, China |
| Shanghai East Hospital, Tongji University Clinical Trial Ethics Committee, No. 1800 Yuntai Road, Pudong District, Shanghai, 200123, China |
| Medical Ethics Committee of Shanghai Pulmonary Hospital, No. 507 Minzheng Road, Yangpu Distr. City, Shanghai, China |
| Ethics Committee of The Affiliated Hospital of Inner Mongolia Medical University, No. 1, Tongadao North Street, Huimin District, Hohhot City, Inner Mongolia, China |
| The First Hospital of Jilin University Ethics Committee, No. 71 Xinmin Main Street, Changchun, Jilin Province, China |
| Ethics Committee of First Hospital of Shanxi Medical University, No. 85 Jiefang South Road, Taiyuan, Shanxi, 030001, China |
| Medical Ethics Committee of the General Hospital of Shenyang Military Command, No. 83 Wenhua Road, Shenhe District, Shenyang, 110016, China |
| Medical Ethics Committee of the Second Xiangya Hospital of Central South University, No. 139 Middle Ranmin Road, Changsha, Hunan, China |
| Drug Ethics Committee of Tianjin Medical University General Hospital, No. 154 An Shan Ave, Heping District, Tianjin, 300052, China |
| Ethics Committee of Beijing Hospital, No. 1 Dongdan Dahua Road, Dongcheng District, Beijing 100730, China |
| Medical Ethics Committee of Jiangxi Provincial Peoples Hospital, No. 152 Aiguo Road, Nanchang City, 330006, China |
| Medical Ethics Committee of Shengjing Hospital of China Medical University, No. 36 Sanhao Street, Heping District, Shenyang, 110004, China |
| Ethics Committee of the First Affiliated Hospital of Nanchang University, No. 17 Yongwai Main Street, Donghu District, Nanchang, Jiangxi Province, China |
| Clinical Trial Ethics Committee of Huazhong University of Science and Technology, No. 13 Hangkong Road, Wuhan City, 430030, China |
| Ethics Committee of Xinhua Hospital Shanghai Jiao Tong University School of Medicine, No. 1665 Kongjiang Road, Yangpu District, Shanghai, China |
| Medical Ethics Committee of Zhejiang Provincial People’s Hospital, No. 158 Shangtang Road, Hanghzou City, Zhejiang Province, China |
| Ethics Committee of Beijing Tongren Hospital, Capital Medical University, No. 1 Dongjiaomin Alley, Dongcheng District, Beijing City, China |
| Drug Clinical Trial Ethics Committee of the Third Affiliated Hospital of Guangzhou Medical University, 3/F Administrative Building, No. 63 Duobao Road, Guangzhou City, China |
| Medical Ethics Committee of Sun Yat-sen Memorial Hospital, Sun Yat-sen University, No. 107 Yanjiang West Road, Guangzhou City, Guangdong Province, China |
| Ethics Committee of the Second Affiliated Hospital of Wenzhou Medical University, No. 109 West Xueyuan Road, Wenzhou, Zhejiang, China |
| Drug Clinical Trial Ethics Committee of Chinese Academy of Medical Sciences, Peking Union Medical College Hospital, No. 41 Damucang Hutong, Xicheng District, Beijing, China |
| Ethics Committee of the Wuxi Hospital of Integrated Chinese Traditional and Western Medicine, No. 585 North Xingyuan Road, Wuxi, Jiangsu, China |
| Medical Ethics Committee of the First Affiliated Hospital of Guangzhou Medical University, 151 Yan Jiang Xi Road, Guangzhou (Canton) 510120, China |
| Guangzhou First Peoples Hospital Ethics Committee, No. 1 Panfu Road, Guangzhou, Guangdong Province, 510180, China |
| Clinical Trial Ethics Committee of the Affiliated Hospital of Xuzhou Medical College, No. 99 Huaihai West Road, Xuzhou City, 221000, China |
| Medical Ethics Committee of the Affiliated Hospital of Baotou Medical College, Inner Mongolia Science and Technology, Lin Yin Road, Kun Du District, Baotou, Inner Mongolia, China |
| Ethics Committee of the First Affiliated Hospital of Xinjiang Medical University, Liyushan South Road 137, Unrumqi 830054, China |
| Ethics Committee of Yangzhou No. 1 People’s Hospital, No. 368 Hanjiang Road, Yangzhou, China |
| Medical Ethics Committee of the Fifth Affiliated Hospital of Sun Yat-Sen University, No. 52 Meihua East Road, Xiangzhou District, Zhuhai, China |
| Ethics Committee of Pingzinag People’s Hospital, No. 8 Wugongshanzhongshan Road, Pingxiang City, China |
| Drug Clinical Trial Ethics Committee of Navy General Hospital, Beijing, China |
| Professional Council for Clinical Medicine Research, Medical Ethics Committee of the First Hospital of China Medical University, No. 155 Nanjing North Street, Heping District, Shenyang City, Liaoning Province, China |
| Medical Ethics Committee of Jinan Central Hospital, No. 105 Jiefang Road, Jinan 250013, China |
| Drug Clinical Trial Ethics Committee of Taizhou Hospital of Zhejiang Province, No. 150 Ximen Street, Linhai City, Zhejiang Province, China |
| Drug Clinical Trial of Ethics Committee of the Third Hospital of Changsha, No. 176 Laodong West Road, Tianxin District, Changsha City 410015, China |
| Medical Ethics Committee of the First People’s Hospital of Lianyungang, No. 182 Tongguan North Road, Lianyungang City, 222002, China |
| Anqing Municipal Hospital Drug Clinical Trial Ethics Committee, Liu Hefu, China |
| Ethics Committee of Yiyang Central Hospital, No. 118 North Kangfu Road, Yiyang, Hunan Province, 221000, China |

# **Figures**

**Supplementary Figure 1:** Spline analysis adjusted for covariates, showing serum potassium as a continuous variable with all-cause mortality over the distribution of potassium values (2.5–8.0 mEq/L) in heart failure (HF), chronic kidney disease (CKD), diabetes mellitus (DM), and combined cohort compared with controls. Data for patients with baseline serum potassium of 8.1–10.0 mEq/L are not reported because the sample size was small (n=138).

**
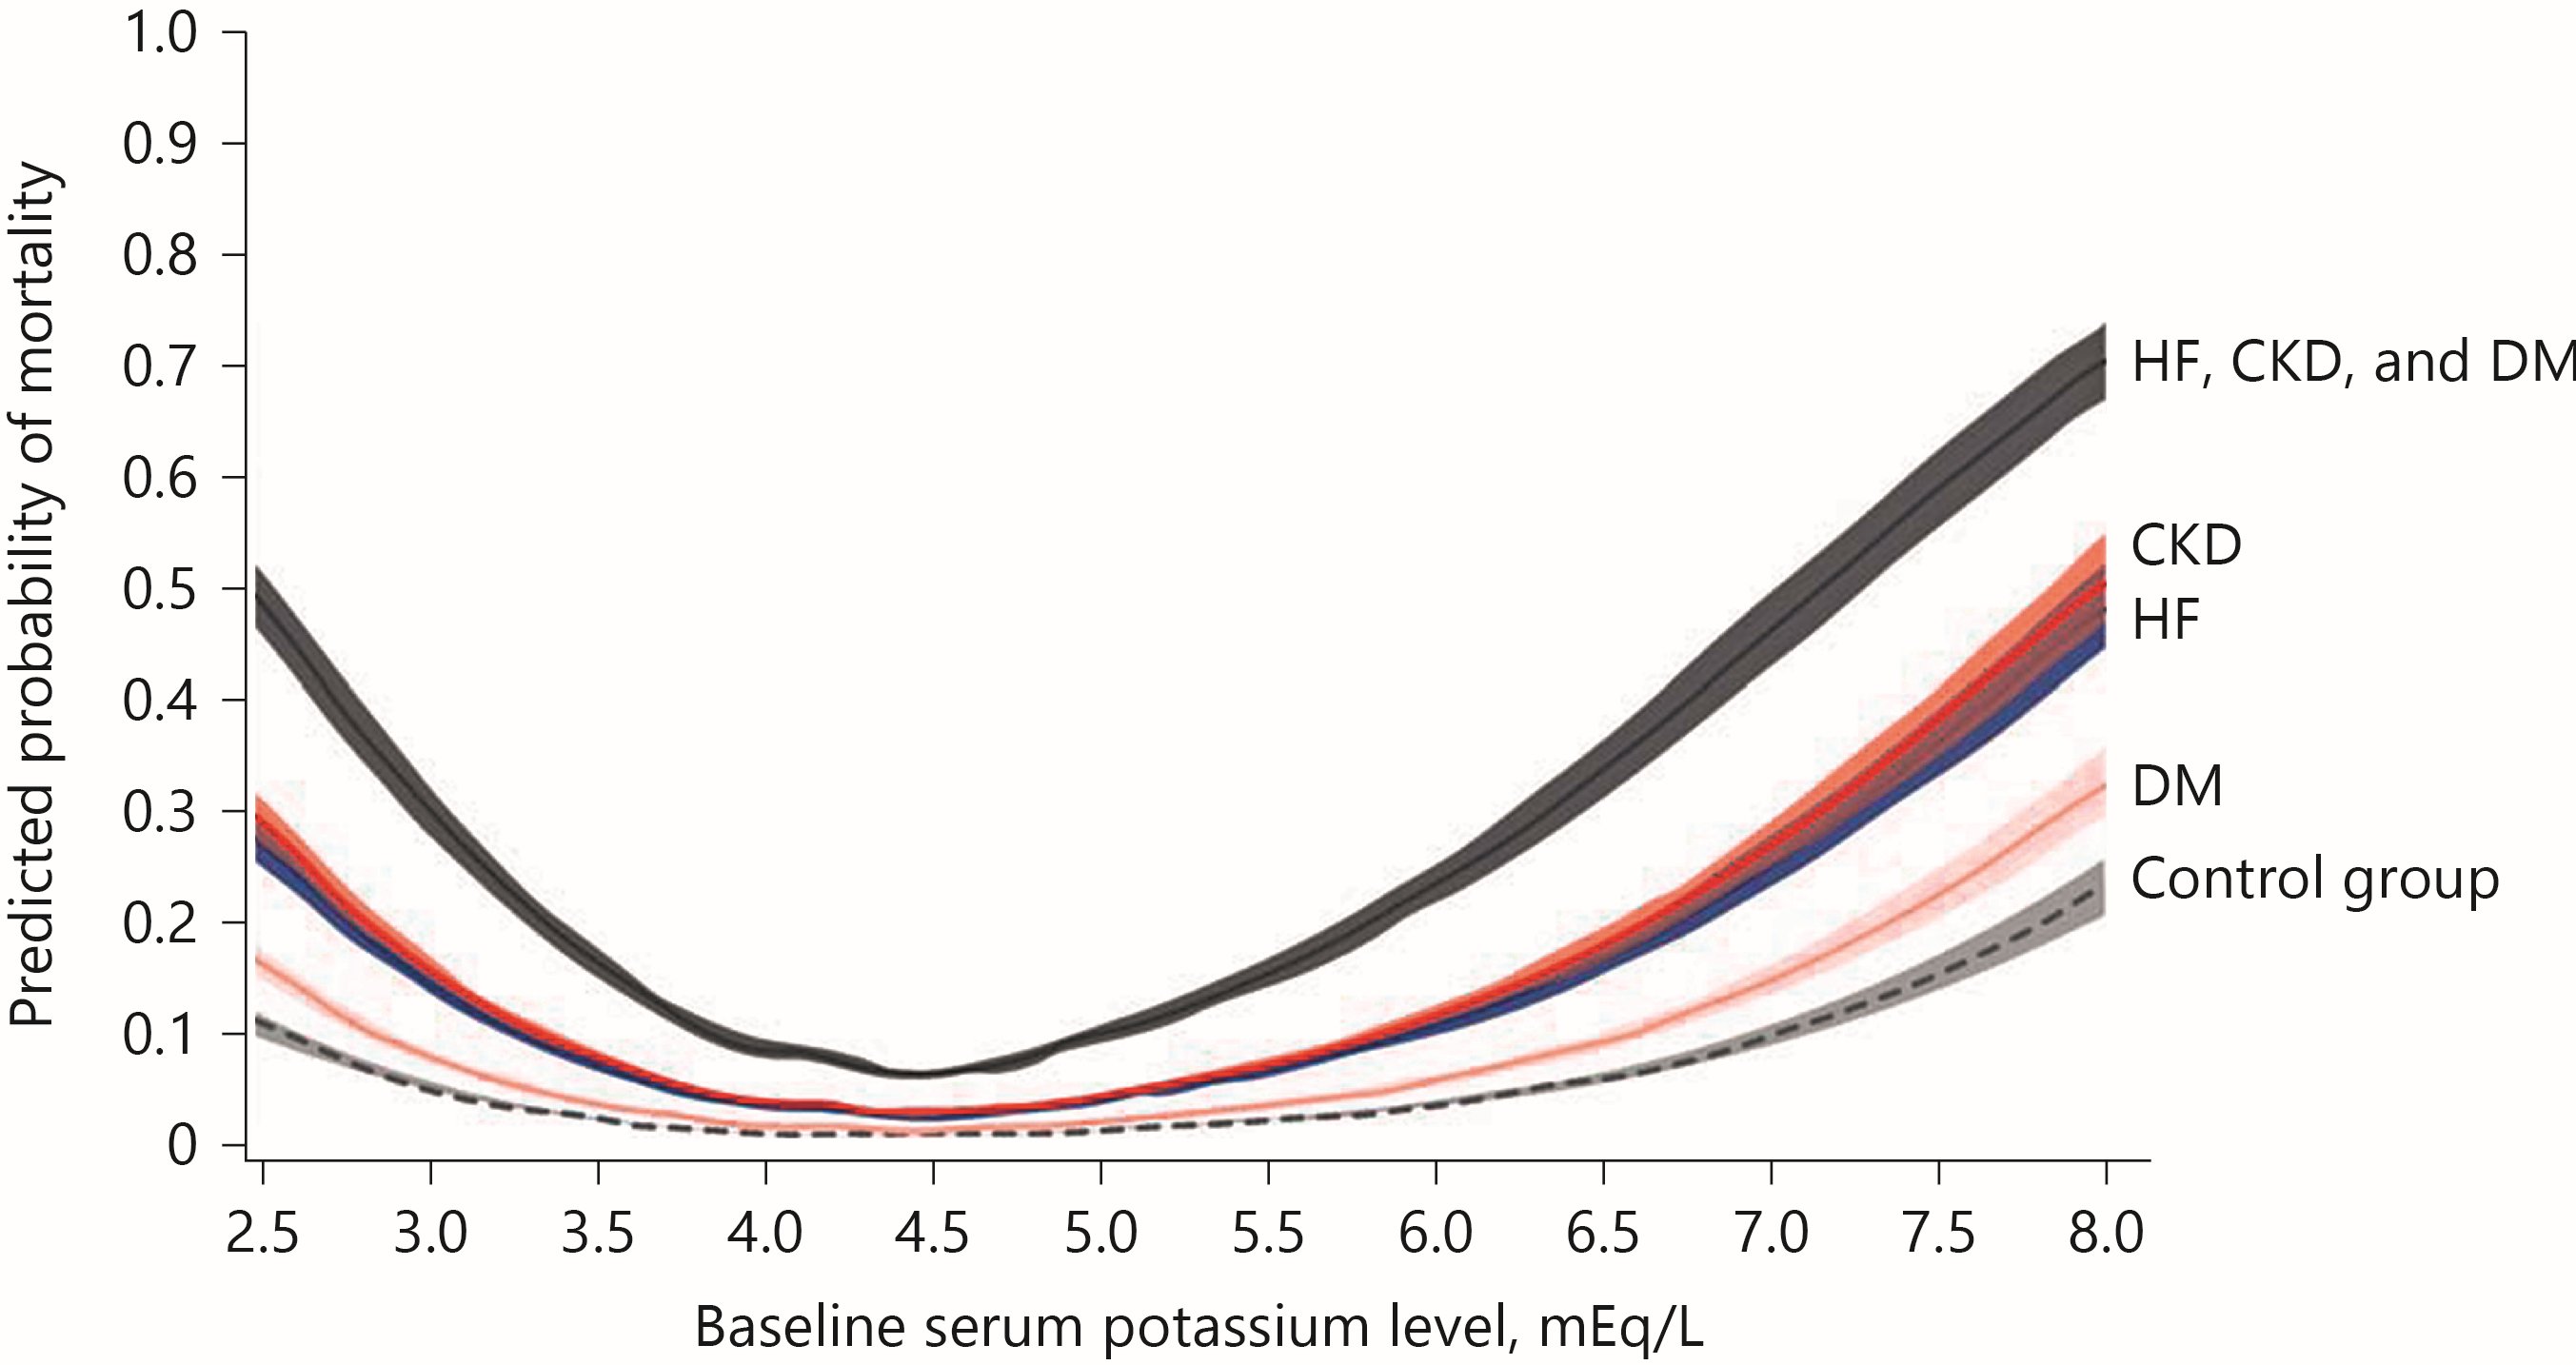
**

Copyright © 2017 by S. Karger AG, Basel. Reproduced with permission from Am J Nephrol Sep 2, 2017;46:(3):213-221 10.1159/000479802. Creative Commons.

**Supplementary Figure 2.** A number of pharmacologic agents and conditions can interfere with the renin-angiotensin-aldosterone system, altering renal potassium excretion. Reabsorption of sodium in the collecting duct increases the luminal electronegativity, providing a more favorable gradient for potassium secretion. Aldosterone is critical for this reabsorptive process. A number of drugs and conditions interfere with the production of aldosterone and, as a result, reduce renal potassium secretion. In some patients, more than 1 disturbance may be present. NSAIDs = nonsteroidal anti-inflammatory drugs.


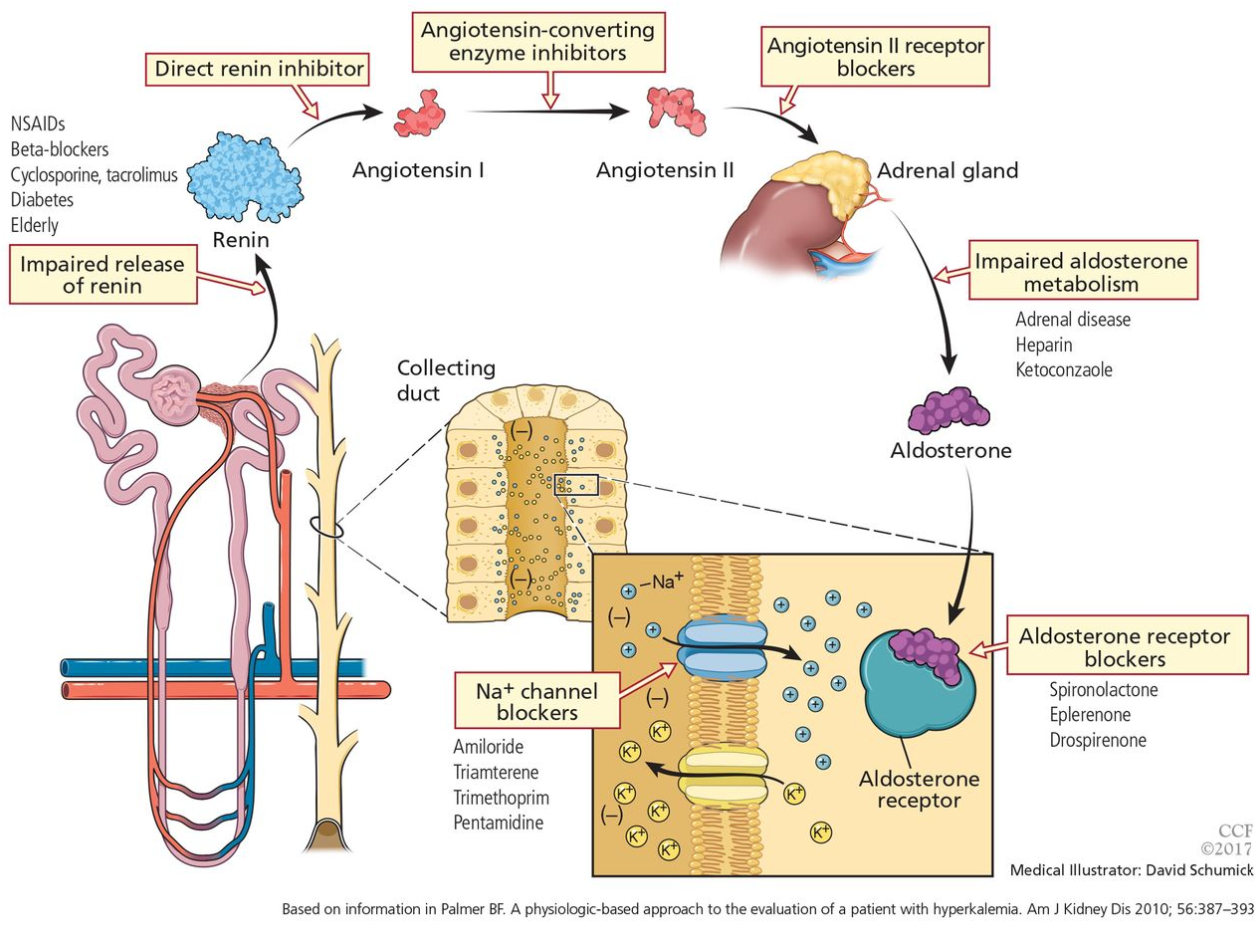


Reprinted with permission from: Palmer B, Clegg D. Diagnosis and treatment of hyperkalemia. Cleve Clin J Med 2017; 84(12): 934-942. Copyright © 2023 Cleveland Clinic Foundation. All rights reserved.
